# Supplementary material
Source: MDPI journal article supplement (https://www.mdpi.com/2077-0472/12/5/719)
Supplement: s1 [file s1]

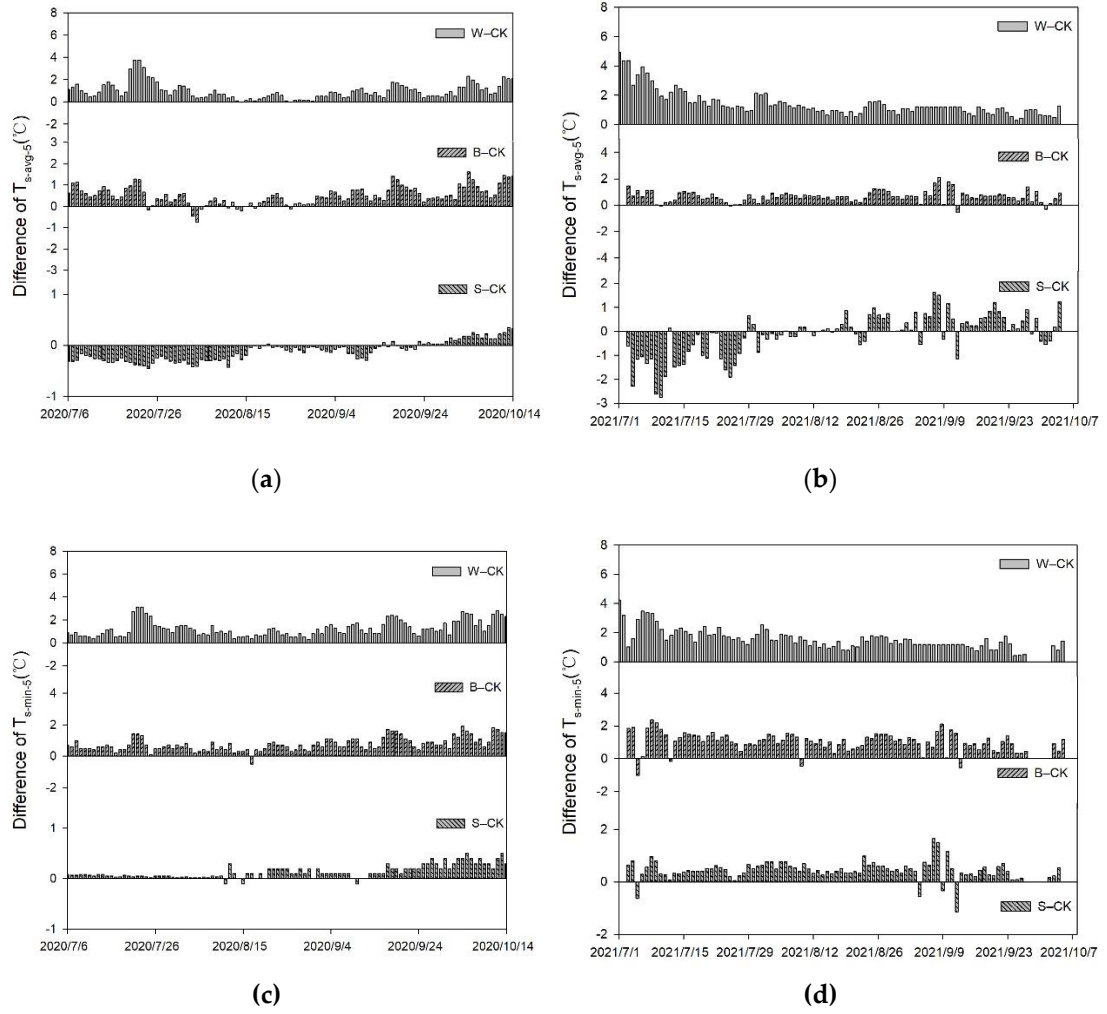

**Figure S1.** Comparison of daily average ( $T_{s-avg-5}$ , a and b) and minimum ( $T_{s-min-5}$ , c and d) soil temperature at the depth of 5cm below ground in the maize growing seasons in 2020 (a and c) and 2021 (b and d) among all treatments. The bars in the figures show the  $T_{s-avg-5}$  or  $T_{s-min-5}$  differences between the three mulching treatments (W, B, and S are transparent film, black film, and straw mulching, respectively) and the CK.

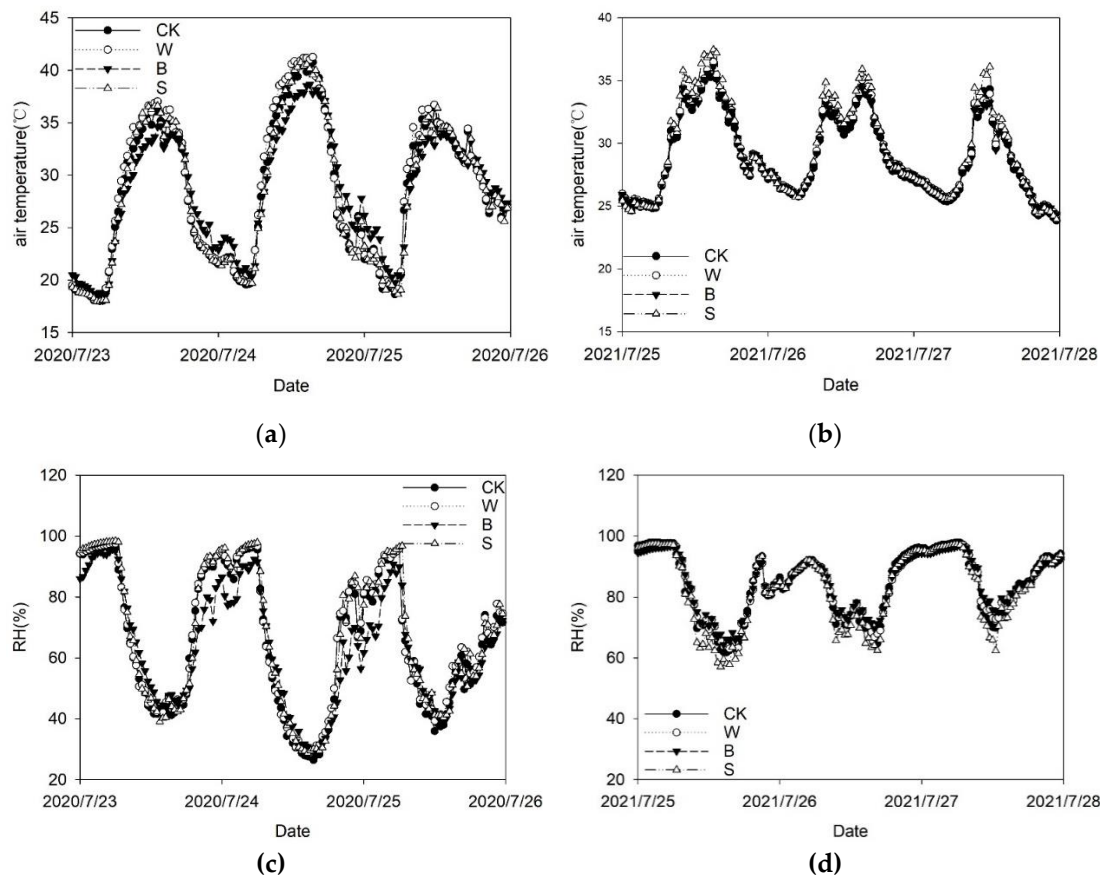

**Figure S2.** Changes in air temperature and humidity under different covering treatments in 2020 (a and b) and 2021(c and d).

**Table S1.** Total variance decomposition table.

| Components | Initial eigenvalue |                     |              | Extract the sum of squares of loads |                     |              | Sum of squares of rotating loads |                     |              |
|------------|--------------------|---------------------|--------------|-------------------------------------|---------------------|--------------|----------------------------------|---------------------|--------------|
|            | Total              | Percentage variance | Accumulate % | Total                               | Percentage variance | Accumulate % | Total                            | Percentage variance | Accumulate % |
| 1          | 4.175              | 69.58               | 69.58        | 4.18                                | 69.58               | 69.58        | 4.17                             | 69.57               | 69.57        |
| 2          | 1.301              | 21.69               | 91.27        | 1.30                                | 21.69               | 91.27        | 1.30                             | 21.70               | 91.27        |
| 3          | 0.380              | 6.34                | 97.61        |                                     |                     |              |                                  |                     |              |
| 4          | 0.087              | 1.44                | 99.05        |                                     |                     |              |                                  |                     |              |
| 5          | 0.046              | 0.77                | 99.82        |                                     |                     |              |                                  |                     |              |
| 6          | 0.011              | 0.18                | 100          |                                     |                     |              |                                  |                     |              |

**Table S2.** Principal component load matrix.

| Factors | Principal component 1 | Principal component 2 |
|---------|-----------------------|-----------------------|
| X1      | -0.932                | 0.277                 |
| X2      | -0.847                | 0.349                 |
| X3      | 0.938                 | 0.204                 |
| X4      |                       | 0.943                 |
| X5      | 0.985                 |                       |
| X6      | 0.857                 | 0.415                 |
